# Supplementary material
Source: PubMed Central journal article supplement (PMC10121754)
Supplement: NIHMS1855515-supplement-1.pdf [file NIHMS1855515-supplement-1.pdf]

Supplementary Figure 1. Kaplan-Meier curve of progression to central involvement for eyes with incident non-central geographic atrophy, according to reticular pseudodrusen status.

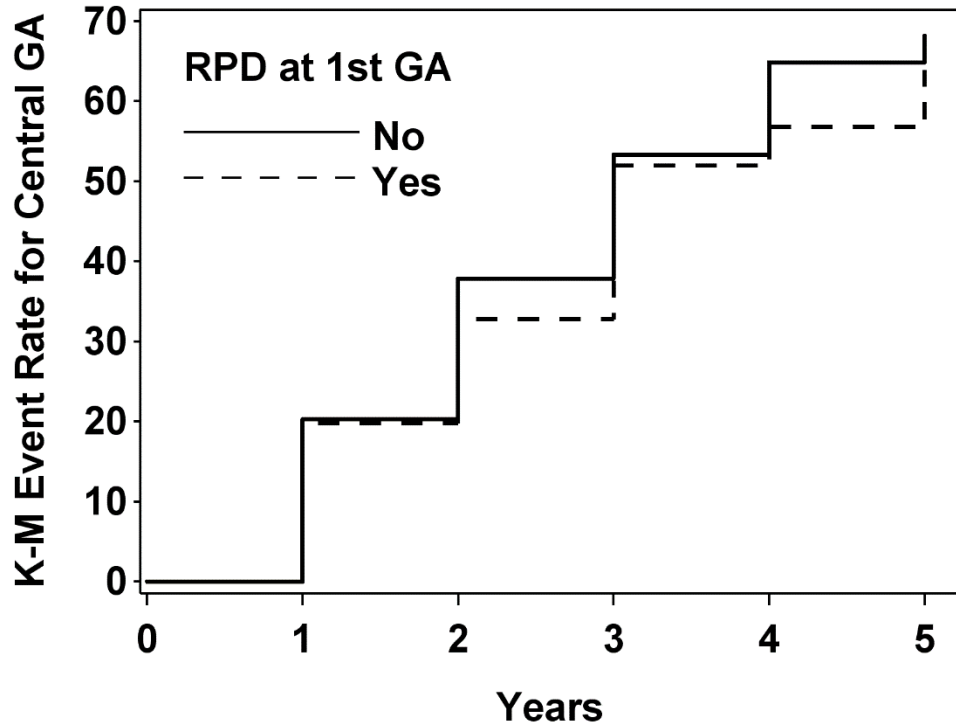

|            | 0   | 1    | 2    | 3    | 4    | 5    |
|------------|-----|------|------|------|------|------|
| <b>No</b>  | 0.0 | 20.3 | 37.9 | 53.3 | 64.9 | 68.2 |
| <b>Yes</b> | 0.0 | 19.8 | 32.8 | 52.0 | 56.8 | 67.6 |

Abbreviations: GA = geographic atrophy; RPD = reticular pseudodrusen
