# Supplementary material
Source: PubMed Central journal article supplement (PMC10121754)
Supplement: NIHMS1855515-supplement-2.pdf [file NIHMS1855515-supplement-2.pdf]

Supplementary Table 1. Demographic, clinical, and genetic characteristics of the study population with prevalent geographic atrophy.

|                                       |                |
|---------------------------------------|----------------|
| Participants                          | 213 (258 eyes) |
| Age (years), mean (SD)                | 75.5 (7.1)     |
| Female                                | 114 (53.5%)    |
| Smoking status                        |                |
| Never                                 | 78 (36.6%)     |
| Former                                | 125 (58.7%)    |
| Current                               | 10 (4.7%)      |
| Education level                       |                |
| High school or less                   | 71 (33.3%)     |
| At least some college                 | 100 (46.9%)    |
| Postgraduate                          | 42 (19.7%)     |
| Follow-up (years), mean (SD)*         | 4.6 (1.1)      |
| Genetics data available               | 106 (49.8%)    |
| rs10490924 <i>ARMS2</i>               |                |
| Unavailable                           | 107            |
| GG                                    | 38 (35.8%)     |
| GT                                    | 48 (45.3%)     |
| TT                                    | 20 (18.9%)     |
| Eyes                                  | 258            |
| RPD present†                          | 11 (4.3%)      |
| Central/noncentral GA                 |                |
| Noncentral                            | 169 (65.5%)    |
| Central                               | 89 (34.5%)     |
| Configuration                         |                |
| Small (single patch <1DA)             | 100 (38.8%)    |
| Multifocal                            | 53 (20.5%)     |
| Horseshoe or ring                     | 18 (7.0%)      |
| Solid                                 | 74 (28.7%)     |
| Indeterminate                         | 13 (5.0%)      |
| Fellow eye with GA                    |                |
| Unknown                               | 35             |
| No                                    | 129 (57.8%)    |
| Yes                                   | 94 (42.2%)     |
| GA area (mm <sup>2</sup> ), mean (SD) | 3.3 (4.0)      |
| Proximity to fovea (μm), mean (SD)    | 404.2 (474.3)  |

Abbreviations: DA=disc areas; GA=geographic atrophy; RPD=reticular pseudodrusen; SD=standard deviation

\* follow-up from baseline

† defined at baseline
