# Supplementary material
Source: PubMed Central journal article supplement (PMC10121754)
Supplement: NIHMS1855515-supplement-3.pdf [file NIHMS1855515-supplement-3.pdf]

Supplementary Table 2. Geographic atrophy enlargement rates according to reticular pseudodrusen status and *ARMS2* genotype, considered simultaneously, with only one eye permitted per participant.

| RPD status or <i>ARMS2</i> risk alleles* | Estimate† (mm/year) | 95% CI (mm/year) | P‡     |
|------------------------------------------|---------------------|------------------|--------|
| RPD absence                              | 0.260               | 0.236-0.283      | 0.0005 |
| RPD presence                             | 0.382               | 0.316-0.447      |        |
| 0 (GG)                                   | 0.258               | 0.213-0.303      | 0.0003 |
| 1 (GT)                                   | 0.347               | 0.304-0.389      |        |
| 2 (TT)                                   | 0.358               | 0.303-0.412      |        |

Abbreviations: CI=confidence interval; RPD=reticular pseudodrusen

\* RPD status defined at study baseline for eyes with prevalent geographic atrophy (GA) and at first GA appearance for eyes with incident GA

† Mixed-model, repeated-measures regression with the square root of GA area as the dependent variable

‡ P value for interaction between characteristic (RPD status or *ARMS2* risk alleles) and years
