# Supplementary material
Source: PubMed Central journal article supplement (PMC10121754)
Supplement: NIHMS1855515-supplement-4.pdf [file NIHMS1855515-supplement-4.pdf]

Supplementary Table 3. Geographic atrophy enlargement rates according to reticular pseudodrusen status and *ARMS2* genotype, considered simultaneously in groups.

| RPD status and <i>ARMS2</i> risk alleles* | N (%) eyes | Estimate† (mm/year) | 95% CI (mm/year) | P‡      |
|-------------------------------------------|------------|---------------------|------------------|---------|
| RPD absence / 0 (GG)                      | 121 (28.8) | 0.217               | 0.191-0.244      | <0.0001 |
| RPD absence / 1-2 (GT+TT)                 | 232 (55.2) | 0.297               | 0.277-0.317      |         |
| RPD presence / 0 (GG)                     | 21 (5.0)   | 0.394               | 0.313-0.475      |         |
| RPD presence / 1-2 (GT+TT)                | 46 (11.0)  | 0.359               | 0.295-0.424      |         |

Abbreviations: CI=confidence interval; RPD=reticular pseudodrusen

\* RPD status defined at study baseline for eyes with prevalent geographic atrophy (GA) and at first GA appearance for eyes with incident GA

† Mixed-model, repeated-measures regression with the square root of GA area as the dependent variable

‡ P value for interaction between characteristic (RPD status/*ARMS2* risk alleles, in 4 levels) and years
