# Supplementary material
Source: PubMed Central journal article supplement (PMC10121754)
Supplement: NIHMS1855515-supplement-5.pdf [file NIHMS1855515-supplement-5.pdf]

Supplementary Table 4. Results of mediation analysis for the outcome of geographic atrophy enlargement rate, with *ARMS2* genotype as exposure and reticular pseudodrusen status as potential mediator, with only one eye permitted per participant.

|                                                                                                          | Estimate†<br>(mm/year) | 95% CI<br>(mm/year) | P     |
|----------------------------------------------------------------------------------------------------------|------------------------|---------------------|-------|
| Natural direct effect of <i>ARMS2</i> genotype on enlargement rate*                                      | 0.085                  | 0.007-0.163         | 0.033 |
| Natural indirect effect of <i>ARMS2</i> genotype on enlargement rate (i.e., mediated by RPD status)*     | 0.002                  | -0.009-0.014        | 0.71  |
| Marginal total effect of <i>ARMS2</i> genotype on enlargement rate (sum of direct and indirect effects)* | 0.087                  | -0.012-0.186        | 0.08  |

Abbreviations: CI=confidence interval; RPD=reticular pseudodrusen

\* RPD status defined at study baseline for eyes with prevalent geographic atrophy (GA) and at first GA appearance for eyes with incident GA; *ARMS2* genotype considered in two levels (0 risk alleles/GG as reference and 1-2 risk alleles/GT+TT as other level)

† slope of change in square root of GA area over time (mm/year), based on a single value per eye
